# Supplementary material for: Insight into the substrate specificity of keratinase KerSMD from Stenotrophomonas maltophilia by site-directed mutagenesis studies in the S1 pocket
Source: Royal Society of Chemistry journal article supplement (doi:10.1039/c5ra12598g), 2015-01-01

1 **Insight into the substrate specificity of keratinase KerSMD from**  
2 ***Stenotrophomonas maltophilia* by site-directed mutagenesis studies in S1 pocket**  
3 **Zhen Fang<sup>1,2,5</sup>, Juan Zhang<sup>1,5,\*</sup>, Baihong Liu<sup>1,2,5</sup>, Guocheng Du<sup>3,5,\*</sup>, Jian**  
4 **Chen<sup>4,5</sup>**

5 <sup>1</sup> *Key Laboratory of Industrial Biotechnology, Ministry of Education, Jiangnan*  
6 *University, Wuxi 214122, China*

7 <sup>2</sup> *Synergetic Innovation Center of Food Safety and Nutrition, Wuxi 214122, China*

8 <sup>3</sup> *Key Laboratory of Carbohydrate Chemistry and Biotechnology, Ministry of*  
9 *Education, Jiangnan University, Wuxi 214122, China*

10 <sup>4</sup> *National Engineering Laboratory for Cereal Fermentation Technology, Jiangnan*  
11 *University, Wuxi 214122, China*

12 <sup>5</sup> *School of Biotechnology, Jiangnan University, Wuxi 214122, China*

13 \*Corresponding authors: Juan Zhang, E-mail: zhangj@jiangnan.edu.cn; Guocheng Du,  
14 E-mail: gcdu@jiangnan.edu.cn. Tel.: +86-510-85918307, Fax: +86-510-85918309;  
15 Fax: +86-510-85914371.

16 School of Biotechnology, Jiangnan University, 1800 Lihu Road, Wuxi 214122,  
17 China.

18

19

20

21

22

23

24 **Table S1.** Nucleotide sequences of primers used for site-directed mutagenesis.

| Mutagenic site                   | Primer sequence (5'-3')                  |
|----------------------------------|------------------------------------------|
| S180G                            | ATGAGCCTGGGTGG <u>GAGG</u> CGGCAGCTGTGAC |
| E208S                            | GCGGCCGGCAACT <u>TCGAC</u> CGACAACGCTT   |
| E208N                            | GCGGCCGGCAACA <u>AACAC</u> CGACAACGCTT   |
| Tyr215 saturation<br>mutagenesis | ACAACGCTTCCAAG <u>NNK</u> CGTCCGGCCAGTTG |
| R216W                            | ACGCTTCCAAGTACT <u>TGGC</u> CGGCCAGTTGC  |
| R216Y                            | ACGCTTCCAAGTACT <u>TACCC</u> GGGCCAGTTGC |

25 <sup>a</sup> Nucleotide sequences corresponding to the mutated amino acids are underlined.

26 <sup>b</sup> N represents A, T, G, or C, and K represents G or T.

27

28

29

30

31

32

33

34

35

36

37

38 **Fig. S1.** The SDS-PAGE of the wild type (KerSMD) and its single site mutants. The  
39 10% (w/v) gel of SDS-PAGE was used. The concentration of protein sample was 2  $\mu$ g.  
40 Before uploaded to gel, all samples were heated at 98 °C for 8 min with 5  $\times$  loading  
41 buffer (Sangong, Shanghai). After electrophoresis, protein was stained with  
42 Coomassie Brilliant Blue R250 and faded with 20% (v/v) acetic acid.

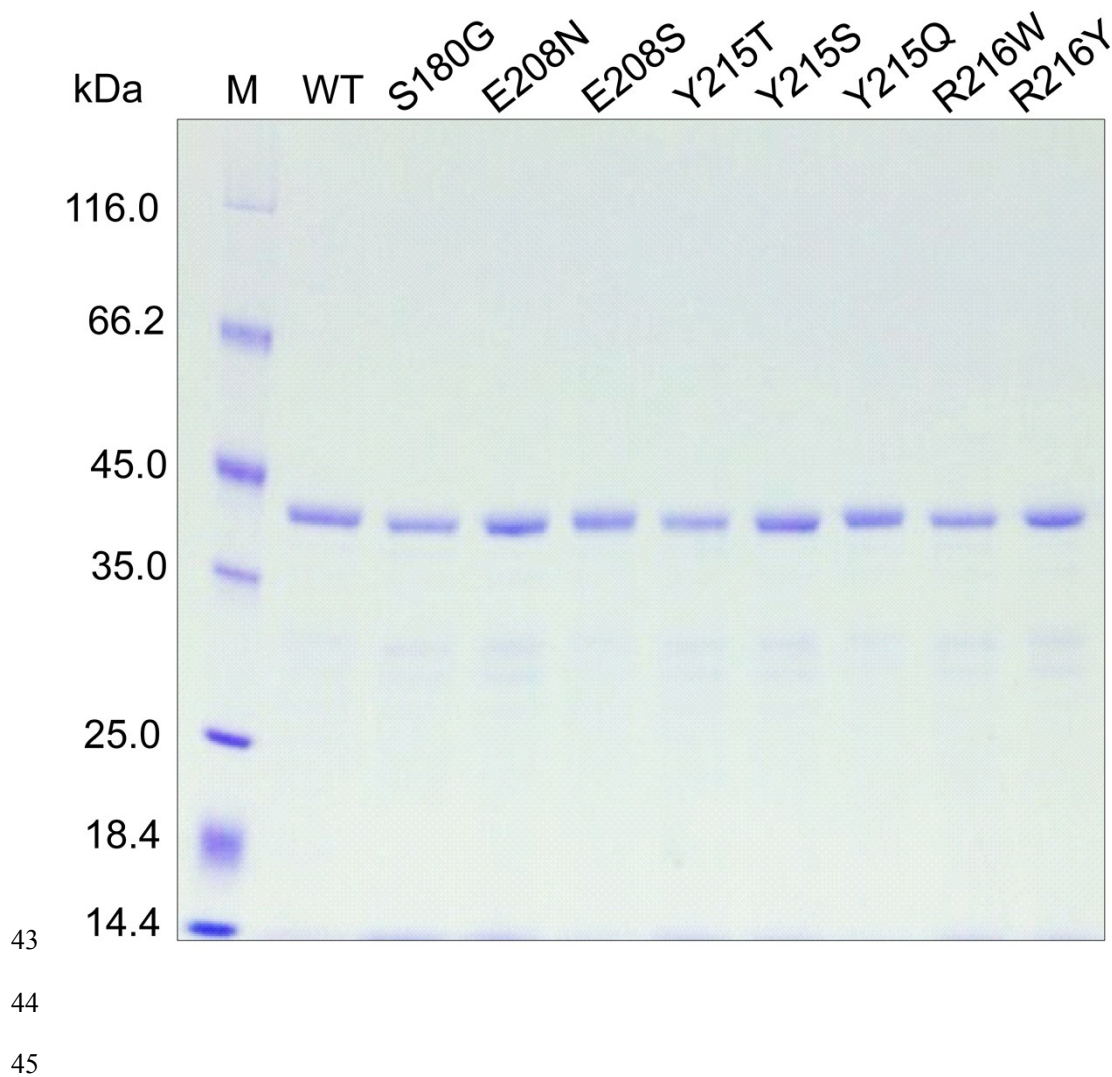

Supplement: c5ra12598g1.pdf [file c5ra12598g1.pdf]
